# Supplementary material
Source: Springer Nature journal article supplement (https://www.springermedizin.de/resource/supplementary/13058_2014_3414_MOESM3_ESM.pdf/9704128)
Supplement: MOESM3 [file 9704128]

## Supplementary Table S1

### Significant peaks and ROC-AUC observed between BC and HV samples in the training set across four chip types

| <i>m/z</i>   | P value      |              |              |              | ROC-AUC      |                |
|--------------|--------------|--------------|--------------|--------------|--------------|----------------|
|              | H50          | IMAC         | CM10         | Q10          | Up-regulated | Down-regulated |
| 2003         |              | 0.001        |              |              |              | 0.305          |
| 3072         |              |              |              | 0.000        | 0.753        |                |
| 3180         |              | 0.005        |              |              | 0.67         |                |
| 3187         |              |              | 0.000        |              | 0.703        |                |
| 3316         | 0.000        |              |              |              |              | 0.205          |
| 3623         |              |              | 0.000        |              | 0.753        |                |
| 3629         | 0.000        |              |              |              | 0.775        |                |
| 3667         |              |              | 0.000        |              | 0.718        |                |
| 3807         |              | 0.001        |              |              | 0.646        |                |
| <b>3808</b>  |              |              | <b>0.000</b> |              | <b>0.749</b> |                |
| 3814         | 0.000        |              |              |              | 0.838        |                |
| 3851         |              |              | 0.000        |              | 0.777        |                |
| 6183         |              | 0.003        |              |              | 0.624        |                |
| 6428         | 0.000        |              |              |              |              | 0.273          |
| 6467         | 0.000        |              |              |              |              | 0.294          |
| <b>6624</b>  | <b>0.000</b> |              |              |              |              | <b>0.232</b>   |
| 6667         | 0.001        |              |              |              |              | 0.323          |
| 6936         |              | 0.000        |              |              | 0.729        |                |
| 6939         |              |              |              | 0.001        |              | 0.262          |
| 7923         |              |              | 0.001        |              | 0.667        |                |
| 7925         |              | 0.004        |              |              | 0.671        |                |
| 8204         |              |              |              | 0.005        | 0.695        |                |
| 8799         | 0.000        |              |              |              | 0.721        |                |
| 8857         | 0.000        |              |              |              | 0.699        |                |
| <b>8916</b>  |              |              |              | <b>0.001</b> | <b>0.755</b> |                |
| 8947         | 0.005        |              |              |              | 0.642        |                |
| 9004         | 0.000        |              |              |              | 0.721        |                |
| 9078         |              | 0.000        |              |              | 0.713        |                |
| 9351         |              | 0.001        |              |              |              | 0.347          |
| 9423         |              |              | 0.006        |              |              | 0.357          |
| 9564         |              |              | 0.000        |              |              | 0.31           |
| 9922         |              |              | 0.000        |              | 0.684        |                |
| 10063        |              | 0.001        |              |              | 0.696        |                |
| 11721        |              | 0.004        |              |              | 0.673        |                |
| 12864        |              |              |              | 0.002        |              | 0.378          |
| 13742        |              |              | 0.001        |              |              |                |
| 13756        |              |              |              | 0.000        | 0.695        |                |
| 13855        | 0.000        |              |              |              | 0.679        |                |
| <b>13870</b> |              | <b>0.000</b> |              |              | <b>0.788</b> |                |
| 13918        |              | 0.004        |              |              | 0.674        |                |
| 13929        |              |              |              | 0.000        |              | 0.342          |

|              |       |       |              |              |
|--------------|-------|-------|--------------|--------------|
| 15235        |       | 0.000 | 0.775        |              |
| 15846        | 0.001 |       | 0.663        |              |
| 15857        |       | 0.000 | 0.817        |              |
| 16050        | 0.002 |       | 0.661        |              |
| 16052        |       | 0.000 | 0.813        |              |
| 16055        |       |       | 0.000        | 0.655        |
| 16500        |       |       | 0.000        | 0.608        |
| 20980        |       | 0.000 |              | 0.276        |
| 21711        |       |       | 0.001        | 0.319        |
| <b>28268</b> |       |       | <b>0.001</b> | <b>0.295</b> |
| 28951        |       |       | 0.003        | 0.335        |
| 29155        |       |       | 0.004        | 0.323        |

---

The five peaks selected for analysis in this study are indicated in bold type.
